# Supplementary material for: Enjoyment of Sexuality and Longevity in Late Midlife and Older Adults: The Longitudinal Ageing Study Amsterdam
Source: PubMed Central journal article supplement — J Appl Gerontol. 2022 Mar 24;41(6):1615–24. doi: 10.1177/07334648221078852 (PMC9082964; doi:10.1177/07334648221078852), 2022-03-24
Supplement: sj-pdf-1-jag-10.1177_07334648221078852.pdf [file sj-pdf-1-jag-10.1177_07334648221078852.pdf]

## Enjoyment of sexuality and longevity in late midlife and older adults:

### the Longitudinal Aging Study Amsterdam

#### Supplemental table

Regression coefficients and confidence intervals (B (CI)) for the effect of enjoyment of sexuality on the LRPD in participants who attach importance to sexuality. Each row indicated by + shows the B (CI) of enjoyment of sexuality when one covariate is added to the basic model. Last row: B (CI) of enjoyment of sexuality in the final model.

|                                          | B     | CI           | p-value |
|------------------------------------------|-------|--------------|---------|
| Basic model <sup>a</sup>                 | 0.782 | 0.289; 1.274 | 0.002   |
| + Sex                                    | 0.783 | 0.291; 1.276 | 0.002   |
| + Education in years                     | 0.787 | 0.296; 1.278 | 0.002   |
| + Job level                              | 0.795 | 0.303; 1.287 | 0.002   |
| + Partner status (partner vs no partner) | 0.757 | 0.266; 1.248 | 0.003   |
| + Self-rated health                      | 0.741 | 0.250; 1.232 | 0.003   |
| + Number of chronic diseases             | 0.787 | 0.299; 1.275 | 0.002   |
| + Number of medications                  | 0.761 | 0.275; 1.248 | 0.002   |
| + Functional limitations                 | 0.713 | 0.229; 1.197 | 0.004   |
| + MiniMental State Exam                  | 0.790 | 0.299; 1.282 | 0.002   |
| + Depressive symptoms                    | 0.728 | 0.236; 1.219 | 0.004   |
| + Positive affect                        | 0.690 | 0.189; 1.191 | 0.007   |
| + Anxiety symptoms                       | 0.788 | 0.294; 1.282 | 0.002   |
| + Sense of mastery                       | 0.749 | 0.254; 1.244 | 0.003   |
| + Emotional support received             | 0.784 | 0.291; 1.277 | 0.002   |

|                              |       |               |       |
|------------------------------|-------|---------------|-------|
| + Social loneliness          | 0.787 | 0.291; 1.282  | 0.002 |
| + Emotional loneliness       | 0.735 | 0.238; 1.233  | 0.004 |
| + Waist circumference        | 0.788 | 0.289; 1.287  | 0.002 |
| + Alcohol consumption        | 0.752 | 0.257; 1.248  | 0.003 |
| + Smoking, % current smokers | 0.795 | 0.308; 1.281  | 0.001 |
| + Attitude towards ageing    | 0.815 | 0.320; 1.309  | 0.001 |
| + Religiousness              | 0.766 | 0.272; 1.259  | 0.002 |
| + Past enjoyment sexuality   | 0.724 | 0.225; 1.224  | 0.004 |
| Final model <sup>b</sup>     | 0.508 | -0.002; 1.018 | 0.051 |

<sup>a</sup> The basic model includes age, enjoyment of sexuality as a continuous variable (square root), importance of sexuality as a dichotomous variable, and the interaction term of enjoyment with importance.

<sup>b</sup> The final model includes positive affect, functional limitations, past enjoyment of sexuality, emotional loneliness, self-rated health, sense of mastery, and alcohol consumption (see Table 4).
